# Supplementary material for: Women’s Autonomy Decision Making Power on Postpartum Modern Contraceptive Use and Associated Factors in North West Ethiopia
Source: Hindawi journal article supplement (doi:10.1155/2019/1861570), 2019-12-08
Supplement: f1 [file 1861570.f1.docx]

Bahir Dar University College of Medicine and Health Science, School of public health,

This is the questionnaire for assessment of women’s autonomous decision making power on PPFP

Introduction; I am _______________working as data collectors in this study that assessment of women’s autonomous decision making power on PPFP and its associated factors among women who attending their children’s immunization service in Sekota Town and its surroundings by Bahir Dar University.

**Purpose of the Research Project:**

**The main aim of the research project is**: - Assessment women’s autonomous decision making power on PPFP and its associated factors among women who attending their children’s immunization service in Sekota Town and its surroundings. This will provide valuable information to planners’ educators and others to design evidence based interventions.

In order to accomplish the project we invite you to take part in our project. If you are willing you need to understand and give informal consent form. Then, you will be requested to take the questionnaire and respond accordingly

**Risk and /or Discomfort**

Participating in this research project don’t have any discomfort and risk except in scarifying your time (to the maximum 30-60 minutes). So your response provides an important input to show the gap and means to improve society’s attitude.

**Benefits**

Participating in this research don’t have any direct benefit as you and your families will use the services in the future.

**Confidentiality**

The information collect from this research project will be kept confidential and information about you that will be collected by this study will be stored in a file, without your name, but a code number assigned to it. It will not be revealed to anyone except the investigators and will be kept locked with key.

**Right to Refusal or Withdraw**

You have the full right to refuse participating in this research. You can choose not to respond some or all the questions) and this will not affect you from getting any kind of health related service and any social service within the community.

**Person to Contact**

This research project was reviewed and approved by the ethical committee of MPH/RH program Bahirdar University College of Medicine and Health Science. If you want to know more information and any question you can contact any of the following individuals.

Ms. Samrawit Yonas Bahr Dar University / 0910356466

Mr. Amanu Aragaw Bair Dar University / 0918780295

Mr. Tadese Ejigu Bair Dar University / 0918301010

Mr. Melash Belachew Bahir Dar university / 0918084553

I have read or hear and understand all the information above and agree to participate on the research project.

Do you agree to participate in this study? Yes________ No________

If yes sign her ……………………

If no, go to the women.

## ANNEX II. QUESTIONNAIRE- ENGLISH VERSION

Bahir Dar University College of Medicine and Health Science

HOW TO APPROACH AND INTERVIEW THE MOTHERS

Once you get the women at immunization clinic, you should get permission to talk to her. Do not rush to ask questions without the permission.

Introduce yourself by name, and explain the purpose of your visit.

Tell “WHY “and “HOW*”* the women is selected for the study.

**At the end of the interview**, tell the respondent that it is the end of the interview, and thank the Individual for giving her time.

If no, go to the women.

Interviewer name --------------------------------------------signature ----------------------

Date of interview -----------------------------Time started ----------------Time completed -----

Result of interview: 1.Completed 2.Refused 3.Incomplete

Checked by supervisor: Name ----------------------------------------------Signature ------------

THANK YOU FOR YOUR COOPERATION

Structured questionnaire on Women’s decision making power on PPMC and associated factors among women who attending their children’s immunization service

1. **Identification**

| **S.No** | **Questions** | **Categories** | **skip** |
| --- | --- | --- | --- |
| 001 | Would you tell me about the time since giving birth to your recent child? | -------------Weeks --------month | **If within 6 week after birth stop** |
| 002 | Questionnaire ID number | _______________ |  |
| 003 | District | 1 Sekota Town 2. Sekota zurya |  |
| 004 | Kebele | _______________ |  |
| 005 | Ketena | _______________ |  |

1. **Introduction**

**PART I: Socio demographic characteristics**

| **No** | | **Questions** | **Categories** | | | | **skip** | | |
| --- | --- | --- | --- | --- | --- | --- | --- | --- | --- |
| 101 | | Age in years? | ­­­­__________ | | | |  | | |
| 102 | | Residence | 1. Rural 2. urban | | | |  | | |
| 102 | | Marital status? | 1. Married  2. Single  3. Widowed  4. Divorced | | | |  | | |
| 103 | | Educational status? | 1. No formal education 2. Primary level (1-8) 3. Secondary level (9-12) 4. Tertiary level (12 and above) | | | |  | | |
| 104 | | What is your ethnicity? | 1. Hmtana 2. Amhara 3. Tigre   88. Other (specify)……… | | | |  | | |
| 105 | | What is your religion? | 1. Orthodox 2. Muslim 3. Protestant 4. Catholic   88. Other (specify)…………… | | | |  | | |
| 106 | | What is your current occupation status? | 1. House wife 2. Student 3. Daily laborer 4. Merchant 5. Government employ 6. Private employ/NGO 7. Farmer 8. Un employed   88. Other (specify)………. | | | |  | | |
| 107 | | What is the monthly family income? | ______Birr | | | |  | | |
| **PART II. Information on reproductive history and preference** | | | | | | | | | |
| **201** | | Gravidity (till now, for how many times have you been pregnant)?  **( including pregnancies of**  **abortions or still births)** | | | | ___________( enter the number) |  | | |
| **202** | | Have you had abortion? | | | | 1. yes  2. no |  | | |
| **203** | | If yes Q No 202 How many times did you have abortions? | | | | ___________( enter the number) |  | | |
| **204** | | Did you have still birth? | | | | ___________( enter the number) |  | | |
| **206** | | Parity (**How many alive children have you delivered, including the present child**?) | | | | ___________( enter the number) |  | | |
| **207** | | How many living children do you  Have by now? | | | | ___________( enter the number) |  | | |
| **208** | | What is the time gap between the  Previous and the present birth? | | | | 1. It is my first birth (Not applicable) 2. Less than or equal 12 months 3. 13-23months 4. >=24 months |  | | |
| **209** | | Is the present birth planned? | | | | 1. Yes ----------------------→  2. No | **1🡪212** | | |
| **210** | | If no to Q 209 unplanned for -- | | | | 1. Spacing 2. Limiting |  | | |
| **211** | | If no to Q 209, did you use a family planning method? | | | | 1. Yes -------------------→ 2. No | **If yes,**  **skip to**  **211** | | |
| **212** | | If no to Q no 211, why didn’t you  Use contraceptives? | | | | 1. Fear of side effects  2. Lack of information about FP  3. Spousal disapproval  4. I was breast feeding  5. I was amenorrhea after delivery and felt I can’t be pregnant  6. absence of FP methods in my  residence  7. absence of chosen method  9.Others, specify------------- |  | | |
| **2013** | | What is your future  Reproductive preference? | | | | 1. Want to have another child  soon (before two years)  2. Want other child but after 2 years.  3. Want no more children  4. I cannot be pregnant  5. Undecided |  | | |
| **Part III Information on breast feeding, menses and sexual activity** | | | | | | | | | |
| **301** | | Have you breastfed your recent  Child? | | | | 1. Yes 2. No-------------------→ | **If , No skip**  **Q 302** | | |
| **302** | | If yes, when did you start breast feeding after birth?  **( if <1 hour, write 00**  **If <24 hours, write hours**  **If > 24 hours, write days)** | | | | 1. Immediately after birth---00  2.----------hours  3. ---------days |  | | |
| **303** | | Are you currently breastfeeding  Your child? | | | | 1. yes  2. No-------------------→ | **If , No skip**  **Q 304** | | |
| **304** | | How many times did you breast feed your child yesterday from  Morning to today morning?  **(Probe for numeric response if response is not numeric)** | | | | ___________( enter the number of 24 hour time feeding) |  | | |
| **305** | | Have you started complementary  Foods for your child before 6 months? | | | | 1. yes  2. No-------------------→ | **If , No skip**  **Q 306** | | |
| **306** | | If yes to Q no. 305, when did you start (at what age of the child did You started additional foods?) | | | | When the child is__________ weeks of age. |  | | |
| **307** | | If you are not currently breastfeeding, up to when did you Breast feed your child? | | | | __________ weeks |  | | |
| **308** | | Is your menses resumed during the first 6 weeks? | | | | 1. yes  2. No-------------------→ | **If , No skip**  **Q 309** | | |
| **309** | | If yes to question No 308, when after birth? | | | | __________ month |  | | |
| **310** | | Did you start sexual intercourse during the first 6 weeks after birth? | | | | 1. yes  2. No-------------------→ | **If , No skip**  **Q 312** | | |
| **311** | | If yes to 310, when did you start sexual intercourse after birth? | | | | __________ weeks |  | | |
| **Part IV. Information on Contraceptive knowledge in the postpartum period** | | | | | | | | | |
| **401** | | Have you ever heard of any contraceptive methods? | | | | 1. yes  2. No |  | | |
| **402** | | If yes for Q 401, list at least one modern contraceptive methods do you heard about? | | | | 1. condom 2. Pills (OCP) 3. injectable 4. IUD 5. Implants 6. Tubal ligation 7. vasectomy   88. Other specify………… |  | | |
| **403** | | Where did you get the information? | | | | 1.Mass media  2.Health professionals  3. HEW  4.friends  5.families  88. Other (specify)…………. |  | | |
| **404** | | Have you ever discussed about use of contraceptives after delivery with your husband? | | | | 1. Yes, once or twice  2. Yes, more often  3. No, never discussed  4. Not applicable |  | | |
| **405** | | What is his idea about use of  Contraceptives? | | | | 1. he approves of use  2. he disapproves use  3. he has no idea  99. I don’t know his idea |  | | |
| **406** | | Can pregnancy happened during PP period? | | | | 1. yes 2. no |  | | |
| **Part V. Information about Women decision making power to use FP and current FP utilization** | | | | | | | | | |
| **501** | | If you used or want to use contraceptive who decide | | | | 1. Self alone 2. Jointly (husband and self),(**Circle it when in conditions their idea did not coincide, the women’s decision accepted)**. 3. Husband 4. Other specify…….. |  | | |
| **502** | | Who decide the method you used or want to use? | | | | 1. Self alone 2. Jointly (husband and self),(**Circle it when in conditions their idea did not coincide, the women’s decision accepted)**. 3. Husband 4. Other specify…….. |  | | |
| **503** | | Who decide the number of children you have and when do have | | | | 1. Self alone 2. Jointly (husband and self) ,(**Circle it when in conditions their idea did not coincide, the women’s decision accepted)**. 3. Husband 4. Other specify……..among women who attending their children’s immunization service |  | | |
| **504** | | Did you use any contraceptive method during the first 6 weeks after this birth? | | | | 1. yes  2. No-------------------→ | **If , No go to**  **Q 512** | | |
| **505** | | If yes Q 504 when did you start the method? | | | | -------- week |  | | |
| **506** | | If yes Q 504 who decided for you to use FP? | | | | 1.I My self  2.My husband  3.My mother  4.Other person specify------------- |  | | |
| **507** | | If yes Q 504 which method was you were using? | | | | 1.Abstained from sex  2. condom  3. Pills (OCP)  4. Injectable  5. IUD  6. Implants  7. Tubal ligation  8.vasectomy  9.Calendar method  10. LAM  88. Other specify………… |  | | |
| **508** | | From where did you get the FP method? | | | | 1. government health facility  2. private health facility  3. NGO facility  4. pharmacies/drug venders  5. HEWs  88. Others(specify)----------- |  | | |
| **509** | | For what purpose you used | | | | 1. To space children 2. To Limiting children 3. Other-------- |  | | |
| **510** | | What is the reason, you are using contraceptive now during the first 6 week after birth? | | | | 1. Just HP advise  2. Partner pressure  3. Family pressure  88. Other specify………… |  | | |
| **511** | | Why do you choose the current FP method? | | | | 1.Health professional advice  2.Because it is suitable to my health  3.From my friends experience and advice  88. Other (specify)………. |  | | |
| **512** | | If you are not used a FP method during PPP, why don’t you use? ( no to Q504) | | | | 1. Fear of side effects  2. want to deliver soon  3. fear of change in breast milk by FP  methods  4. like of time  5. Spousal disapproval  6. feeling of not susceptible to  pregnancy due to breastfeeding  7. feeling of not at risk of pregnancy due  to amenorrhea  8. absence of FP methods in my  residence  9. lack of money for FP service  10. absence of chosen method  88.Others, specify------------- |  | | |
| **513** | | Do you use any contraceptive methods currently? | | | | 1. Yes 2. No |  | | |
| **514** | | If yes Q 507 which method was you were using? | | | | 1.Abstained from sex  2. condom  3. Pills (OCP)  4. Injectable  5. IUD  6. Implants  7. Tubal ligation  8.vasectomy  9.Calendar method  10. LAM  88. Other specify………… |  | | |
| **515** | | When did you start in relation/sexual intercourse/ to menses? | | | | 1. Before my menses resumes  2. In the same week when my menses resumes  3. After my menses resumes  99. I don’t remember |  | | |
| **516** | | If your answer is No Q513 do you want use modern contraceptive in the future? | | | | 1. Yes 2. no |  | | |
| **Part VI. Information about contact with a health professional** | | | | | | | | | |
| **601** | | Did you have antenatal care for your recent pregnancy at least Ones? | | | | 1. Yes  2. No |  | | |
| **602** | | If yes Q 601 did you counsel about PPFP? | | | | 1. Yes  2. No |  | | |
|  | |  | | | |  |  | | |
| **603** | | Where was the place of  Delivery? index child | | | | 1. Government health institution  2. Private health institution  3. At home  88. Others(specify)-------------- |  | | |
| **604** | | Did you have postnatal care for your index birth at least Ones? | | | |  |  | | |
| **605** | | Did you have any contact with  a health professional after  Giving birth? (For postpartum  care, for child immunization or  for well child/ sick child clinic  Visit during PPP…) | | | | 1. Yes  2. No |  | | |
| **606** | | If yes to Q 604 and/or to Q  605 or if the delivery was in  health institution, Did you  counseled about postpartum  Family planning? | | | | 1. Yes  2. No |  | | |
| **Part VII. Knowledge about lactational amenorrhea method** | | | | | | | | | |
|  | | | | | | | | | |
|  |  | | |  | | | |  | |
| **701** | | Have you heard about LAM of contraception? | | | 1. Yes  2. No **-------------if no, stop the**  **interview here** | | | |  |
| **702** | | If yes to 701, what was the  Source of information? | | | 1. Public health institution  2. Private health institution  3. Mass media (radio, TV…)  4. Print media (books, journals…)  5. HEW  6. School  7. Friends, relatives, mothers…  8. Spouse  88. others(specify)----------------- | | | |  |
| **703** | | What are the conditions that need to be met for LAM to be used as a  Method of family planning?  ***(Do not read answers aloud. Probe for responses and circle the appropriate code)***  **(M = Mentioned, NM =**  **Not Mentioned)** | | | M NM  1. Exclusively breastfeeding  2. Fully or nearly fully  Breastfeeding  3. Breastfeeding on demand  4. Infant is < 6 months old  5. Menstrual cycle has  not returned  88. Other, (specify) --------------------------  99. I Don’t know | | | |  |

**Thank you very much!!!!**
